# Supplementary material for: Silvopasture offers climate change mitigation and profit potential for farmers in the eastern United States
Source: Frontiers journal article supplement (doi:10.3389/fsufs.2023.1158459), 2023-10-10
Supplement: Table_2.XLSX [file Table_2.XLSX]

## Sheet: Greene_TableS2
Table S2. Categories of cost data by system type and activity. To forecast the costs of a typical enterprise, we cataloged each management activity, complete with non-labor inputs (examples: mulch, fertilizer, sprays) and the labor time required to perform the task. Tasks necessary to manage a tree system will vary by farm, based on different tools, implements and efficiencies. The table highligh…
Longleaf Pine
Hardiness Zone	Zone 7 through 10A	Gilman, Edward F., and Dennis G. Watson. "Pinus Palustris Longleaf Pine." USDA Forest Service, Oct. 1994, https://hort.ifas.ufl.edu/database/documents/pdf/tree_fact_sheets/pinpala.pdf.
Spacing	8x2m = 6.5 ft in row * 26.24 ft between row = 500 trees per ha. Thinned down to 150 trees/ha.	Esquivel, Jorge I., and Santiago M. Lacorte. "SISTEMAS SILVOPASTORILES-MARCO CONCEPTUAL." La Asociaci√≥n Argentina de Consorcios Regionales de Experimentaci√≥n Agr√≠cola, https://www.gba.gob.ar/sites/default/files/agroindustria/docs/SSPi_Marco_conceptual_Esquivel.pdf.
Yield, Wood	First Thinning, Year 19: $180/acre (10x8ft spacing = 544 trees/acre, or at 20x12 (33% trees): $60/acre) * 176%, for 2000-2023 inflation	"The Economics of Longleaf Pine Management; A Road to Making Dollars and Sense." The Longleaf Alliance, https://americaslongleaf.org/media/3bun5rqc/the-economics-of-longleaf-pine-management-final-longleaf-alliance.pdf.
Yield, Wood	Second Thinning, Year 29: $450/acre (10x8ft spacing = 544 trees/acre, or at 20x12 (33% trees): $150/acre) * 176%, for 2000-2023 inflation	"The Economics of Longleaf Pine Management; A Road to Making Dollars and Sense." The Longleaf Alliance, https://americaslongleaf.org/media/3bun5rqc/the-economics-of-longleaf-pine-management-final-longleaf-alliance.pdf.
Average Price, Pulpwood	$9/ton	Dickens, E. David, John Sunday, and David J. Moorhead. "Series paper #8 Economics of growing loblolly, longleaf, and slash pine to various rotation ages with three stumpage price sets, four establishment cost sets, four discount rates, with and without pine straw ‚Äì soil expectation value." University of Georgia; Georgia Forestry Commission, Dec. 2014, https://bugwoodcloud.org/bugwood/productivi…
BFT per 11" x 16 ft log	49 BFT per .1913 green ton of sawlog	Dickens, E. David, John Sunday, and David J. Moorhead. "Series paper #8 Economics of growing loblolly, longleaf, and slash pine to various rotation ages with three stumpage price sets, four establishment cost sets, four discount rates, with and without pine straw ‚Äì soil expectation value." University of Georgia; Georgia Forestry Commission, Dec. 2014, https://bugwoodcloud.org/bugwood/productivi…
Price per BFT, #2 Common, Wholesale	$.625 per BFT, wholesale	"Inflation Adjusted Lumber Market Still Hit Records in 20-21." Structural Building Components Association, 4 Feb. 2022, https://www.sbcacomponents.com/media/inflation-adjusted-lumber-market-still-hit-records-in-20-21.
Price per BFT, C Select, Retail	$2.26 per BFT, retail	"Inflation Adjusted Lumber Market Still Hit Records in 20-21." Structural Building Components Association, 4 Feb. 2022, https://www.sbcacomponents.com/media/inflation-adjusted-lumber-market-still-hit-records-in-20-21.
Price per BFT, C Select, Wholesale	$1.13 per BFT, wholesale	"Inflation Adjusted Lumber Market Still Hit Records in 20-21." Structural Building Components Association, 4 Feb. 2022, https://www.sbcacomponents.com/media/inflation-adjusted-lumber-market-still-hit-records-in-20-21.
Density, Longleaf Pine	650 kg/m3, or 41 lbs/ft3	"The Wood Database." Longleaf Pine, The Wood Database, July 2021, https://www.wood-database.com/longleaf-pine/.
Tree Height, Relative to DBH	11" DBH = 73 feet tall. Height is 79.67x DBH	"Individual tree diameter, height, and volume functions for longleaf pine." USDA Forest Service, https://www.fs.usda.gov/research/treesearch/45566.
Root to Shoot Ratio (AGB:BGB)	24.49% BGB:ABG	Samuelson, Lisa J., et al. "Ecosystem carbon stocks in Pinus palustris forests." Canadian Journal of Forest Research, 24 Jan. 2014, https://cdnsciencepub.com/doi/10.1139/cjfr-2013-0446.
Site Prep: Chemical + Mechanical	$320/acre * 128%, for 2014-2023 inflation	Dickens, E. David, John Sunday, and David J. Moorhead. "Series paper #8 Economics of growing loblolly, longleaf, and slash pine to various rotation ages with three stumpage price sets, four establishment cost sets, four discount rates, with and without pine straw ‚Äì soil expectation value." University of Georgia; Georgia Forestry Commission, Dec. 2014, https://bugwoodcloud.org/bugwood/productivi…
Site Prep: Burn	$35/acre * 128%, for 2014-2023 inflation	Dickens, E. David, John Sunday, and David J. Moorhead. "Series paper #8 Economics of growing loblolly, longleaf, and slash pine to various rotation ages with three stumpage price sets, four establishment cost sets, four discount rates, with and without pine straw ‚Äì soil expectation value." University of Georgia; Georgia Forestry Commission, Dec. 2014, https://bugwoodcloud.org/bugwood/productivi…
Planting	$80 per acre, or $.11 per tree. (this is low) * 128%, for 2014-2023 inflation	Dickens, E. David, John Sunday, and David J. Moorhead. "Series paper #8 Economics of growing loblolly, longleaf, and slash pine to various rotation ages with three stumpage price sets, four establishment cost sets, four discount rates, with and without pine straw ‚Äì soil expectation value." University of Georgia; Georgia Forestry Commission, Dec. 2014, https://bugwoodcloud.org/bugwood/productivi…
Burning Costs	$15/acre starting at Age 3, done every 3 years * 176%, for 2000-2023 inflation	"The Economics of Longleaf Pine Management; A Road to Making Dollars and Sense." The Longleaf Alliance, https://americaslongleaf.org/media/3bun5rqc/the-economics-of-longleaf-pine-management-final-longleaf-alliance.pdf.
Fertilization	$50/acre, starting Year 10, repeated every 5 years * 176%, for 2000-2023 inflation	"The Economics of Longleaf Pine Management; A Road to Making Dollars and Sense." The Longleaf Alliance, https://americaslongleaf.org/media/3bun5rqc/the-economics-of-longleaf-pine-management-final-longleaf-alliance.pdf.
Noncommercial Thinning, Year 4	Thin 52% of trees, by Year 3, to 300 trees per ha. Moved thinning to Year 4, due to different climate & species	Esquivel, Jorge I., and Santiago M. Lacorte. "SISTEMAS SILVOPASTORILES-MARCO CONCEPTUAL." La Asociaci√≥n Argentina de Consorcios Regionales de Experimentaci√≥n Agr√≠cola, https://www.gba.gob.ar/sites/default/files/agroindustria/docs/SSPi_Marco_conceptual_Esquivel.pdf.
Pruning #1, to 2m	1 minute per tree, with first thinning	Esquivel, Jorge I., and Santiago M. Lacorte. "SISTEMAS SILVOPASTORILES-MARCO CONCEPTUAL." La Asociaci√≥n Argentina de Consorcios Regionales de Experimentaci√≥n Agr√≠cola, https://www.gba.gob.ar/sites/default/files/agroindustria/docs/SSPi_Marco_conceptual_Esquivel.pdf.
Pruning #2, to 4m	2 minutes per tree, Year 7 (adapted)	Esquivel, Jorge I., and Santiago M. Lacorte. "SISTEMAS SILVOPASTORILES-MARCO CONCEPTUAL." La Asociaci√≥n Argentina de Consorcios Regionales de Experimentaci√≥n Agr√≠cola, https://www.gba.gob.ar/sites/default/files/agroindustria/docs/SSPi_Marco_conceptual_Esquivel.pdf.
Pruning #2, to 6m	3 minutes per tree, Year 11 (adapted)	Esquivel, Jorge I., and Santiago M. Lacorte. "SISTEMAS SILVOPASTORILES-MARCO CONCEPTUAL." La Asociaci√≥n Argentina de Consorcios Regionales de Experimentaci√≥n Agr√≠cola, https://www.gba.gob.ar/sites/default/files/agroindustria/docs/SSPi_Marco_conceptual_Esquivel.pdf.
Pulpwood Thinning, Cost per Ton	$21.34 per ton ‚Üí $3.45 per tree in cost	Dickens, E. David, John Sunday, and David J. Moorhead. "Series paper #8 Economics of growing loblolly, longleaf, and slash pine to various rotation ages with three stumpage price sets, four establishment cost sets, four discount rates, with and without pine straw ‚Äì soil expectation value." University of Georgia; Georgia Forestry Commission, Dec. 2014, https://bugwoodcloud.org/bugwood/productivi…
Fell & Buck tree (chainsaw)	Total time per tree equation: -2.4295 + 0.4222DBH + 0.0002DistT^2 ‚Üí -2.4295 + .4222(11) + .0002(269) ‚Üí 2:16 per tree in plantation, sawlogs	Long, Charles Robert. "Production and Cost Analysis of Two Harvesting Systems in Central Appalachia." West Virginia University, 2003, https://researchrepository.wvu.edu/etd/1327/.
Cable Skid to Portable Mill	163 ft3 per hour = 466 BFT / hr. If $100/hr, that's $.21/BFT	Long, Charles Robert. "Production and Cost Analysis of Two Harvesting Systems in Central Appalachia." West Virginia University, 2003, https://researchrepository.wvu.edu/etd/1327/.
Mill log	Contract: ($120/hr)/(800 BFT/hr * 50% up time) = $.30/BFT. Need 2 people.	"LT28 Portable Sawmill." Wood-Mizer, 2023, https://woodmizer.com/us/LT28-Portable-Sawmill.
Sales & Marketing Overhead, Lumber	COGS of a sawmill is 80%	"POLE BUILDING PRICES: BEWARE WHEN YOU COMPARE." Hansen Buildings, 8 Apr. 2016, https://www.hansenpolebuildings.com/tag/lumber-yard-profit-margin/.
Sales & Marketing Overhead, Lumber	(100*150*49*2*.0695/24)/(100*150*49)*3600 = 21 seconds per BFT to sell specialty Longleaf Pine	"Sawmill Financial Aspects." Fort Lewis College, https://ocs.fortlewis.edu/swcommunityforestry/workshops/sawmill%20improvement/data/Presentations%20Articles%20Worksheets/Sawmill%20and%20the%20Bottom%20Line/4a.%20Sawmill%20Financial%20Aspects.pdf.
Hybrid Poplar, Curly Poplar
Hardiness Zone	USDA Hardiness Zone 3-9	"Cold Stream Farm." Hybrid Poplar. Cold Stream Farm, https://www.coldstreamfarm.net/product/hybrid-poplar/.
Yield	43.5 BFT at 15 years, and again at 30 years	Netzer, D.A. et al. "Growth, Yield, and Disease Resistance of 7- to 12-Year-Old Poplar Clones in the North Central United States." USDA Forest Service, 11 Dec. 2002, https://www.fs.usda.gov/research/treesearch/11787.
Spacing	In Overyield: 12 ft in row * 40 ft between row = 224 trees per ha.	Esquivel, Jorge I., and Santiago M. Lacorte. "SISTEMAS SILVOPASTORILES-MARCO CONCEPTUAL." La Asociaci√≥n Argentina de Consorcios Regionales de Experimentaci√≥n Agr√≠cola, https://www.gba.gob.ar/sites/default/files/agroindustria/docs/SSPi_Marco_conceptual_Esquivel.pdf.
Wood Density	440 kg/m3	"The Wood Database." White Poplar, The Wood Database, July 2021, https://www.wood-database.com/white-poplar/.
DBH:Height ratio	1 inch DBH = 94 inches height	"Biomass Production Study of Hybrid Poplar Grown on Deep Trenched Municipal Biosolids." University of Maryland Extension, Oct. 2014, https://extension.umd.edu/sites/extension.umd.edu/files/publications/FS-993%20Biomass%20Production%20Study%20of%20Hybrid%20Poplar.pdf.
BGB:AGB ratio	.22/.78 = 28% = BGB:AGB (Table 1 in citation)	Wotherspoon, Amy & Thevathasan, Naresh & Gordon, Andy & Voroney, Paul. (2014). Carbon sequestration potential of five tree species in a 25-year-old temperate tree-based intercropping system in southern Ontario, Canada. Agroforestry Systems. 10.1007/s10457-014-9719-0.
Pricing	Pre-2020 average: Wholesale price is .624/bft	"Inflation Adjusted Lumber Market Still Hit Records in 20-21." Structural Building Components Association, 4 Feb. 2022, https://www.sbcacomponents.com/media/inflation-adjusted-lumber-market-still-hit-records-in-20-21.
Pricing	Home Depot Margin is 64%. Markup is 81%. ‚Üí .624*1.81 = $1.13 per bft	"Inflation Adjusted Lumber Market Still Hit Records in 20-21." Structural Building Components Association, 4 Feb. 2022, https://www.sbcacomponents.com/media/inflation-adjusted-lumber-market-still-hit-records-in-20-21.
Pricing, mulch retail	$30/yard	Propagate Ag, March 2022, www.propagateag.com
Nursery Stock Cost, UK	Rods, 1.5m, .72 Euros * 1.1 = USD * 1.2 for shipping = $.95 USD	"SRC Poplar Cuttings and Rods." Crops for Energy, May 2023, https://www.crops4energy.co.uk/src-poplar-cuttings-and-rods/.
Nursery Stock Cost, Germany	Rods, $1.26 euros * 1.1 = $1.39 USD	Lignovis GmbH. "Ligno Plant 'Grow your energy'." Lignovis GmbH, May 2023, https://www.lignoplant.com/en/poplar-willow-shop/poplar-planting-material.html#Poplar-Mix.
Nursery Stock Cost, France	5.69 for a rod	Van Lerberghe, Philippe & Parizel, Alexandre. (2020). Le peuplier agroforestier - Techniques et co√ªts de plantation.
Nursery Srock Cost, USA	$6.00, Double A Vineyards (Willow proxy)	"Double A Vineyards." Double A Vineyards, Feb. 2021, https://doubleavineyards.com/.
Nursery Stock Cost, Average	$3.51 average
Plow, Disk, Smooth		Propagate Ag, March 2022, www.propagateag.com
Order & Receive Trees	12 hours per year	Propagate Ag, March 2022, www.propagateag.com
Drill Holes	Contracted: 3:15 for 100 holes = 57 seconds per hole. Contract = $.99 per tree (2019 Euro to 2023 USD)	Van Lerberghe, Philippe & Parizel, Alexandre. (2020). Le peuplier agroforestier - Techniques et co√ªts de plantation.
Planting the rods	Contracted: 7 hours for 100 trees = 4:12 per tree. Contract = $.78 per tree (2019 Euro to 2023 USD)	Van Lerberghe, Philippe & Parizel, Alexandre. (2020). Le peuplier agroforestier - Techniques et co√ªts de plantation.
Pruning, Year 2	5:24 per tree (from the ground)	Van Lerberghe, Philippe & Parizel, Alexandre. (2020). Le peuplier agroforestier - Techniques et co√ªts de plantation.
Pruning, Year 4	6:00 per tree (from the ground)	Van Lerberghe, Philippe & Parizel, Alexandre. (2020). Le peuplier agroforestier - Techniques et co√ªts de plantation.
Pruning, Year 6	7:30 per tree (from the ground)	Van Lerberghe, Philippe & Parizel, Alexandre. (2020). Le peuplier agroforestier - Techniques et co√ªts de plantation.
Pruning, Year 8	15:00 per tree (from a scissor lift) ‚Üí Switched to 7:30 from ground; scissor lift cost prohibitive	Van Lerberghe, Philippe & Parizel, Alexandre. (2020). Le peuplier agroforestier - Techniques et co√ªts de plantation.
Disking, Single Activity	Year 1-7, 3x per year, $30 per acre	N√©meth, M√°rton. Sylvanus Forestry. March 2021, https://silvanusforestry.com/en/.
Fell tree (chainsaw)	Total time per tree equation: -2.4295 + 0.4222DBH + 0.0002DistT^2 ‚Üí -2.4295 + .4222(10.6) + .0002(144) ‚Üí 2:04 per tree in plantation, sawlogs	Long, Charles Robert. "Production and Cost Analysis of Two Harvesting Systems in Central Appalachia." West Virginia University, 2003, https://researchrepository.wvu.edu/etd/1327/.
Cable Skid to Portable Mill	163 ft3 per hour = 466 BFT / hr. If we're at $100/hr, that's $.21/BFT	Long, Charles Robert. "Production and Cost Analysis of Two Harvesting Systems in Central Appalachia." West Virginia University, 2003, https://researchrepository.wvu.edu/etd/1327/.
Mill log	Contract: ($120/hr)/(800 BFT/hr * 50% up time) = $.30/BFT. Need 2 people.	"LT28 Portable Sawmill." Wood-Mizer, 2023, https://woodmizer.com/us/LT28-Portable-Sawmill.
Chip tops of trees	104 seconds per m3, over .3 m3 per tree = 31 seconds per tree to chip. Need chipper + grapple.	Manzone, Marco, and Paolo Balsari. "Productivity and woodchip quality of different chippers during poplar plantation harvesting." Biomass and Bioenergy, Dec. 2015, https://www.sciencedirect.com/science/article/abs/pii/S0961953415301203.
Sales & Marketing Overhead, Lumber	(100*91*43*1.13*.0695/24)/(100*91*43)*3600 = 11.8 seconds per BFT retail dimensional lumber	"Sawmill Financial Aspects." Fort Lewis College, https://ocs.fortlewis.edu/swcommunityforestry/workshops/sawmill%20improvement/data/Presentations%20Articles%20Worksheets/Sawmill%20and%20the%20Bottom%20Line/4a.%20Sawmill%20Financial%20Aspects.pdf.
Sales & Marketing Overhead, Lumber	(100*91*43*.624*.0695/24)/(100*91*43)*3600 = 6.5 seconds per BFT wholesale dimensional lumber	"Sawmill Financial Aspects." Fort Lewis College, https://ocs.fortlewis.edu/swcommunityforestry/workshops/sawmill%20improvement/data/Presentations%20Articles%20Worksheets/Sawmill%20and%20the%20Bottom%20Line/4a.%20Sawmill%20Financial%20Aspects.pdf.
Black Walnut
Hardiness Zone	USDA Zone 4-9	"Black Walnut." Ohio Department of Natural Resources, https://ohiodnr.gov/discover-and-learn/plants-trees/broad-leaf-trees/black-walnut-juglans-nigra.
Spacing	In Overyield: 12 x 60 ft, 149 stems/ha	Propagate Ag, March 2022, www.propagateag.com
Median Annual Increment	.33 inches per year ‚Üí 9.9, 13.2, 16.5, and 19.8 inches DBH at Year 30, 40, 50, and 60 respectively	Van Sambeek, J. W.; Rink, George. 1981. Physiology and silviculture of black walnut for combined timber and nut production. In: Guries, R. P., ed. Proceedings of the Second North Central Tree Improvement Conference. Madison, WI: University of Wisconsin-Madison: 25-33
Median Annual Increment	.293 inches per year ‚Üí 8.8 inches at Year 30, 11.7 inches at Year 40, 14.7 inches at Year 50, 17.6 inches at Yr 60	Loseke, Benjamin A., and Dennis M. Adams. "Growth of Black Walnut in Southeast Nebraska." Nebraska Forest Service, https://nfs.unl.edu/documents/ruralforestry/BlackWalnutTechReport.pdf.
Yield, Wood	Doyle: 16 ft sawlog: 22, 59, 114, and 185 BFT at Year 30, 40, 50, and 60	Van Sambeek, J. W.; Rink, George. 1981. Physiology and silviculture of black walnut for combined timber and nut production. In: Guries, R. P., ed. Proceedings of the Second North Central Tree Improvement Conference. Madison, WI: University of Wisconsin-Madison: 25-33
Yield, Grading	Graded: 60% is FAS if it's a plantation log, 40% is #1 common.	Timmermans, Steve. Personal interview. 30 June 2023. https://everwoods.ca/.
Price per BFT, FAS, Retail	$9.1/BFT retail	Timmermans, Steve. Personal interview. 30 June 2023. https://everwoods.ca/.
Price per BFT, FAS, Wholesale	$7.00/BFT wholesale	Timmermans, Steve. Personal interview. 30 June 2023. https://everwoods.ca/.
Price per BFT, Select, Retail	$7.80/BFT retail	Timmermans, Steve. Personal interview. 30 June 2023. https://everwoods.ca/.
Price per BFT, Select, Wholesale	$6/BFT wholesale	Timmermans, Steve. Personal interview. 30 June 2023. https://everwoods.ca/.
Price per BFT, #1 Common, Retail	$6.50/BFT retail	Timmermans, Steve. Personal interview. 30 June 2023. https://everwoods.ca/.
Price per BFT, #1 Common, Wholesale	$5/BFT retail	Timmermans, Steve. Personal interview. 30 June 2023. https://everwoods.ca/.
Density, Black Walnut	610 kg/m3	"The Wood Database." Black Walnut, The Wood Database, July 2021, https://www.wood-database.com/black-walnut/.
Tree Height, Relative to DBH	Height is 59x DBH	Ares, Adrian & Brauer, David. (2004). Growth and nut production of black walnut in relation to site, tree type and stand conditions in south-central United States. Agroforestry Systems. 63. 83-90. 10.1023/B:AGFO.0000049436.54654.05.
Root to Shoot Ratio (AGB:BGB)	22% BGB:ABG	Wotherspoon, Amy & Thevathasan, Naresh & Gordon, Andy & Voroney, Paul. (2014). Carbon sequestration potential of five tree species in a 25-year-old temperate tree-based intercropping system in southern Ontario, Canada. Agroforestry Systems. 10.1007/s10457-014-9719-0.
Cost of Nursery Stock	$.44 each, including shipping	Virginia Department of Forestry, July 2021, https://www.buyvatrees.com/.
Thousand Cankers	Estimate: 2% mortality per year, Year 5-30	Grant, Jerome & Windham, Mark & Haun, Walker & Wiggins, Gregory & Lambdin, Paris. (2011). Initial Assessment of Thousand Cankers Disease on Black Walnut, Juglans nigra, in Eastern Tennessee. Forests. 23390. 741-748. 10.3390/f2030741.
Buck Rub	Estimate: 2% mortality per year, Year 1-8	Timmermans, Steve. Personal interview. 30 June 2023. https://everwoods.ca/.
Order & Receive Trees	12 hours per year	Propagate Ag, March 2022, www.propagateag.com
Soil Prep: Subsoil + Disk	$50/acre	Propagate Ag, March 2022, www.propagateag.com
Plant tree	$4.00/tree	Propagate Ag, March 2022, www.propagateag.com
Deer Protection	$13.18 * 1.26 for 2015-2023 inflation = $16.61 per acre	Godsey, Larry D. "Estimating Willingness to Pay for Protection of Eastern Black Walnut from Deer Damage." Central Hardwoods Forest Conference, https://www.researchgate.net/publication/265352328_Estimating_willingnEss_to_pay_for_protEction_of_EastErn_Black_walnut_from_dEEr_damagE.
Thin 2% of trees at Year 9	Estimate based on extension recommendations	Baughman, Mel, and Lenny Farlee. "Managing Black Walnut." University of Minnesota Extension; Purdue Extension, [n.d.], https://www.treefarmsystem.org/stuff/contentmgr/files/1/83513ba128f737e0e618e8756d08b694/files/black_walnut_management_tree_farm.pdf.
Pruning, Year 3	17 seconds per tree (this is for improved genetics; not included with seedlings due to noncommercial thinning)	N√©meth, M√°rton. Sylvanus Forestry. March 2021, https://silvanusforestry.com/en/.
Pruning, Year 5	28 seconds per tree	N√©meth, M√°rton. Sylvanus Forestry. March 2021, https://silvanusforestry.com/en/.
Pruning, Year 7	82 seconds per tree	N√©meth, M√°rton. Sylvanus Forestry. March 2021, https://silvanusforestry.com/en/.
Pruning, Year 10	82 seconds per tree	N√©meth, M√°rton. Sylvanus Forestry. March 2021, https://silvanusforestry.com/en/.
Disking, Single Activity	Year 1-7, 3x per year, $30 per acre	N√©meth, M√°rton. Sylvanus Forestry. March 2021, https://silvanusforestry.com/en/.
Thin (Monitor Crown Width)	Year 9: 28 seconds per tree that is thinned, equivalent to pruning. But done on 5% of trees, so the time is in walking. ‚Üí 28 seconds * 400% = 1:52, but on 5% of the trees.	N√©meth, M√°rton. Sylvanus Forestry. March 2021, https://silvanusforestry.com/en/.
Harvest Overhead	32 hours in harvest years: coordinating, contract, legal	Baughman, Mel, and Lenny Farlee. "Managing Black Walnut." University of Minnesota Extension; Purdue Extension, [n.d.], https://www.treefarmsystem.org/stuff/contentmgr/files/1/83513ba128f737e0e618e8756d08b694/files/black_walnut_management_tree_farm.pdf.
Fell & Buck tree (chainsaw)	Total time per tree equation: -2.4295 + 0.4222DBH + 0.0002DistT^2 ‚Üí -2.4295 + .4222(11) + .0002(144) ‚Üí 2:14 per tree in plantation, sawlogs	Long, Charles Robert. "Production and Cost Analysis of Two Harvesting Systems in Central Appalachia." West Virginia University, 2003, https://researchrepository.wvu.edu/etd/1327/.
Cable Skid to Portable Mill	163 ft3 per hour = 466 BFT / hr. If we're at $100/hr, that's $.21/BFT	Long, Charles Robert. "Production and Cost Analysis of Two Harvesting Systems in Central Appalachia." West Virginia University, 2003, https://researchrepository.wvu.edu/etd/1327/.
Mill log	Contract: ($120/hr)/(800 BFT/hr * 50% up time) = $.30/BFT. Need 2 people.	"LT28 Portable Sawmill." Wood-Mizer, 2023, https://woodmizer.com/us/LT28-Portable-Sawmill.
Sales & Marketing Overhead, Lumber	COGS of a sawmill is 80%	"POLE BUILDING PRICES: BEWARE WHEN YOU COMPARE." Hansen Buildings, 8 Apr. 2016, https://www.hansenpolebuildings.com/tag/lumber-yard-profit-margin/.
Sales & Marketing Overhead, Lumber	(100*150*49*2*.0695/24)/(100*150*49)*3600 = 21 seconds per BFT to sell black walnut	"Sawmill Financial Aspects." Fort Lewis College, https://ocs.fortlewis.edu/swcommunityforestry/workshops/sawmill%20improvement/data/Presentations%20Articles%20Worksheets/Sawmill%20and%20the%20Bottom%20Line/4a.%20Sawmill%20Financial%20Aspects.pdf.
Black Locust
Hardiness	USDA Hardiness Zone 4-8	"Black Locust." Iowa State University Extension and Outreach. https://naturalresources.extension.iastate.edu/forestry/iowa_trees/trees/black_locust.html.
Yield	Year 15: .64 m3 per tree = 271 "BFT" per tree, but 40-60% of this (109-162 BFT) is lumber. The rest is posts and firewood. More biomass is monetized in Hungary.	N√©meth, M√°rton. Sylvanus Forestry. March 2021, https://silvanusforestry.com/en/.
Yield	Year 17: 16 ft of post wood + firewood	R√©dei, K√°roly & Csiha, Imre & Keser≈±, Zsolt & V√©gh, √Ågnes & Gy≈ëri, Judit. (2011). The Silviculture of Black Locust (Robinia pseudoacacia L.) in Hungary: a Review. SEEFOR - South-East European Forestry. 2. 10.15177/seefor.11-11.
Yield	Year 22: 16 ft of post wood + firewood	R√©dei, K√°roly & Csiha, Imre & Keser≈±, Zsolt & V√©gh, √Ågnes & Gy≈ëri, Judit. (2011). The Silviculture of Black Locust (Robinia pseudoacacia L.) in Hungary: a Review. SEEFOR - South-East European Forestry. 2. 10.15177/seefor.11-11.
Yield	Year 30: Trees are 8.66" DBH = 22 BFT of that is lumber, but total wood volume is 163 BFT/tree (270 m3/ha / 700 trees)	R√©dei, K√°roly & Csiha, Imre & Keser≈±, Zsolt & V√©gh, √Ågnes & Gy≈ëri, Judit. (2011). The Silviculture of Black Locust (Robinia pseudoacacia L.) in Hungary: a Review. SEEFOR - South-East European Forestry. 2. 10.15177/seefor.11-11.
Spacing	Sufficient production given 50% shade	Lin, C.H., McGraw, R.L., George, M.F. et al. Shade effects on forage crops with potential in temperate agroforestry practices. Agroforestry Systems 44, 109‚Äì119 (1998). https://doi.org/10.1023/A:1006205116354
Spacing	92% control yields at 100 trees/ha, 80% control yield at 200 trees/ha	Gang, W., Zhongxuan, Z., Barker, M., Xiu, Y., Hongmei, K., & Jingzhu, Z. (2003). Effect of intercropping distance on crop yield in a paulownia-wheat agroforestry system in the huang-huai-hai plain, china. Forests Trees and Livelihoods, 13(1), 7-16. https://doi.org/10.1080/14728028.2003.9752441
Spacing	In Overyield: 3.28 x 40 ft, 820 stems/ha, thinned to fewer than 102 stems/ha
Spacing	Spacing in Hungary: 2.4 m by 0.7 to 1.0 m (4000 stems/ha)	R√©dei, K√°roly & Csiha, Imre & Keser≈±, Zsolt & V√©gh, √Ågnes & Gy≈ëri, Judit. (2011). The Silviculture of Black Locust (Robinia pseudoacacia L.) in Hungary: a Review. SEEFOR - South-East European Forestry. 2. 10.15177/seefor.11-11.
Spacing	40ft between row, 1m in row	Esquivel, Jorge I., and Santiago M. Lacorte. "SISTEMAS SILVOPASTORILES-MARCO CONCEPTUAL." La Asociaci√≥n Argentina de Consorcios Regionales de Experimentaci√≥n Agr√≠cola, https://www.gba.gob.ar/sites/default/files/agroindustria/docs/SSPi_Marco_conceptual_Esquivel.pdf.
Thinning	Thinning during years 3-6 ‚Üí Reduces to 500 stems/ha	R√©dei, K√°roly & Csiha, Imre & Keser≈±, Zsolt & V√©gh, √Ågnes & Gy≈ëri, Judit. (2011). The Silviculture of Black Locust (Robinia pseudoacacia L.) in Hungary: a Review. SEEFOR - South-East European Forestry. 2. 10.15177/seefor.11-11.
Growth Rate	Peak of CAI is 20 years. Peak of MAI is 35-40 years.	R√©dei, K√°roly & Csiha, Imre & Keser≈±, Zsolt & V√©gh, √Ågnes & Gy≈ëri, Judit. (2011). The Silviculture of Black Locust (Robinia pseudoacacia L.) in Hungary: a Review. SEEFOR - South-East European Forestry. 2. 10.15177/seefor.11-11.
Height:DBH Ratio	1:111 ‚Üí For every inch or cm in DBH, tree is 111x as high	R√©dei, K√°roly & Csiha, Imre & Keser≈±, Zsolt & V√©gh, √Ågnes & Gy≈ëri, Judit. (2011). The Silviculture of Black Locust (Robinia pseudoacacia L.) in Hungary: a Review. SEEFOR - South-East European Forestry. 2. 10.15177/seefor.11-11.
Wood Density	770 kg/m3	"The Wood Database." Black Locust, The Wood Database, July 2021, https://www.wood-database.com/black-locust/.
BGB:AGB ratio	27% BGB:AGB	Estimate
Pricing, rough sawn dimensional lumber	$5.10/bft retail, #1 common	Robi Decking. 2022, https://robidecking.com/?gclid=Cj0KCQjwz8emBhDrARIsANNJjS7Ph11JjCxzi22gjKDDRVR1nEqCiMEdawDgQeboKuBdXx5Yc11NQSUaAtGQEALw_wcB
Pricing, rough sawn dimensional lumber	$4/bft retail, #2 common	"Locust Lumber Company." Locust Lumber Company, [n.d.], https://locustlumbercompany.com/. Accessed May 2022.
Pricing, fenceposts wholesale	$1.72/lft, wholesale	CNY Fencing. Elam Hertzler, April 2022.
Pricing, fenceposts retail	$21 for 5" 8 ft post, retail ‚Üí $2.63/lft	"8 ft. x 5 in. Treated Wood Fence Post." Tractor Supply Co., May 2023, https://www.tractorsupply.com/tsc/product/cca-pressure-treated-wood-post-5-in-6-in-x-8-ft.
Pricing, firewood	$400/cord = $178/m3 = $.42/bft; $300/cord = $133/m3 = $.31/bft	"U.S. firewood seeing boom in sales, rise in prices." Northwest Arkansas Democrat Gazette, 21 Nov. 2021, https://www.nwaonline.com/news/2021/nov/21/us-firewood-seeing-boom-in-sales-rise-in-prices/.
Cost of Nursery Stock	$.25 each, including shipping	Virginia Department of Forestry, July 2021, https://www.buyvatrees.com/.
Plow, Disk, Smooth	.52 per tree	Propagate Ag, March 2022, www.propagateag.com
Order & Receive Trees	12 hours per year	Propagate Ag, March 2022, www.propagateag.com
Plant with tree planter	$800 per day / 4166 trees = $.19 per tree	Mainforest. 2023, https://mainforest.hu/.
Pruning, Year 2	17 seconds per tree	N√©meth, M√°rton. Sylvanus Forestry. March 2021, https://silvanusforestry.com/en/.
Pruning, Year 3	28 seconds per tree	N√©meth, M√°rton. Sylvanus Forestry. March 2021, https://silvanusforestry.com/en/.
Pruning, Year 5	82 seconds per tree	N√©meth, M√°rton. Sylvanus Forestry. March 2021, https://silvanusforestry.com/en/.
Pruning, Year 4	17 seconds per tree	N√©meth, M√°rton. Sylvanus Forestry. March 2021, https://silvanusforestry.com/en/.
Pruning, Year 8	82 seconds per tree	N√©meth, M√°rton. Sylvanus Forestry. March 2021, https://silvanusforestry.com/en/.
Disking, Single Activity	Year 1-7, 3x per year, $30 per acre	N√©meth, M√°rton. Sylvanus Forestry. March 2021, https://silvanusforestry.com/en/.
Cleaning (Noncommercial thinning)	Adapted from: Year 4: 3750 down to 2700 = Thin 25% of the trees	R√©dei, K. Management of black Locust (Robinia pseudoacacia L.) stands in Hungary. Journal of Forestry Research 13, 260‚Äì264 (2002). https://doi.org/10.1007/BF02860087
Cleaning (Noncommercial thinning)	Adapted from: Year 4: 17 seconds per tree that is thinned, equivalent to pruning	N√©meth, M√°rton. Sylvanus Forestry. March 2021, https://silvanusforestry.com/en/.
Cleaning (firewood thinning)	Adapted from: Year 12: 2700 down to 1800 = Thin another 33% of the trees	R√©dei, K. Management of black Locust (Robinia pseudoacacia L.) stands in Hungary. Journal of Forestry Research 13, 260‚Äì264 (2002). https://doi.org/10.1007/BF02860087
Cleaning (firewood thinning)	Adapted from: Year 12: 28 seconds per tree that is thinned, equivalent to pruning	N√©meth, M√°rton. Sylvanus Forestry. March 2021, https://silvanusforestry.com/en/.
Selective Thinning	Adapted from: Year 17: 1800 down to 1100 = Thin 38% of trees as posts	R√©dei, K. Management of black Locust (Robinia pseudoacacia L.) stands in Hungary. Journal of Forestry Research 13, 260‚Äì264 (2002). https://doi.org/10.1007/BF02860087
Increment Thinning	Adapted from: Year 22: 1100 down to 700 = Thin 36% of trees as posts	R√©dei, K. Management of black Locust (Robinia pseudoacacia L.) stands in Hungary. Journal of Forestry Research 13, 260‚Äì264 (2002). https://doi.org/10.1007/BF02860087
Harvest Cutting	Adapted from: Year 30: 700 down to 0 = Harvest remaining trees	R√©dei, K. Management of black Locust (Robinia pseudoacacia L.) stands in Hungary. Journal of Forestry Research 13, 260‚Äì264 (2002). https://doi.org/10.1007/BF02860087
Process thinned firewood	Year 12: 3 hours per cord = per tree	Miller, Garrett. "Finger Lakes Cider House." 2023, https://www.fingerlakesciderhouse.com/.
Fell tree (chainsaw)	Total time per tree equation: -2.4295 + 0.4222DBH + 0.0002DistT^2 ‚Üí -2.4295 + .4222(9) + .0002(144) ‚Üí 1:26 per tree in plantation, sawlogs	Long, Charles Robert. "Production and Cost Analysis of Two Harvesting Systems in Central Appalachia." West Virginia University, 2003, https://researchrepository.wvu.edu/etd/1327/.
Cable Skid Sawlogs	.25 m3 in the whole tree = 8.82 ft3 per sawlog = 18.5 posts per hour = $5.40 per tree at $100/hr	Long, Charles Robert. "Production and Cost Analysis of Two Harvesting Systems in Central Appalachia." West Virginia University, 2003, https://researchrepository.wvu.edu/etd/1327/.
Cable Skid Fenceposts	2.47 ft3 per post = 67 posts per hour = $1.49 per post at $100/hr	Long, Charles Robert. "Production and Cost Analysis of Two Harvesting Systems in Central Appalachia." West Virginia University, 2003, https://researchrepository.wvu.edu/etd/1327/.
Cable Skid Fenceposts	3.88 ft3 per post = 42 posts per hour = $2.38 per post at $100/hr	Long, Charles Robert. "Production and Cost Analysis of Two Harvesting Systems in Central Appalachia." West Virginia University, 2003, https://researchrepository.wvu.edu/etd/1327/.
Mill log	Contract: ($120/hr)/(800 BFT/hr * 50% up time) = $.30/BFT. Need 2 people.	"LT28 Portable Sawmill." Wood-Mizer, 2023, https://woodmizer.com/us/LT28-Portable-Sawmill.
Process Firewood	2 hours to cut but not stack a cord of firewood.	Miller, Garrett. "Finger Lakes Cider House." 2023, https://www.fingerlakesciderhouse.com/.
Sales & Marketing Overhead, Lumber	(100*61*21*5.10*.0695/24)/(100*61*21)*3600 = 53 seconds per BFT to sell specialty lumber, retail	"Sawmill Financial Aspects." Fort Lewis College, https://ocs.fortlewis.edu/swcommunityforestry/workshops/sawmill%20improvement/data/Presentations%20Articles%20Worksheets/Sawmill%20and%20the%20Bottom%20Line/4a.%20Sawmill%20Financial%20Aspects.pdf.
Sales & Marketing Overhead, Lumber	(100*61*21*5.10*.0695/24)/(100*61*21)*3600 = 31 seconds per BFT to sell specialty lumber, wholesale	"Sawmill Financial Aspects." Fort Lewis College, https://ocs.fortlewis.edu/swcommunityforestry/workshops/sawmill%20improvement/data/Presentations%20Articles%20Worksheets/Sawmill%20and%20the%20Bottom%20Line/4a.%20Sawmill%20Financial%20Aspects.pdf.
Sales & Marketing Overhead, Posts	(100*96*16*2*.0695/24)/(100*96*16)*3600 = 21 seconds per LFT to sell posts, or 5 minutes per post	"Sawmill Financial Aspects." Fort Lewis College, https://ocs.fortlewis.edu/swcommunityforestry/workshops/sawmill%20improvement/data/Presentations%20Articles%20Worksheets/Sawmill%20and%20the%20Bottom%20Line/4a.%20Sawmill%20Financial%20Aspects.pdf.
Pecans
Hardiness Zone	5-9, but it's realistically 6-9.	"Carya illinoinensis." Missouri Botanical Garden, https://www.missouribotanicalgarden.org/PlantFinder/PlantFinderDetails.aspx?taxonid=281352.
Yield	Maximum yield is 1500 lbs per acre, at Year 20, and number of trees decreases.	Upson, Steve, et al. "Pecan Production 101." Noble Research Institute, https://www.noble.org/ag-publications/horticulture/pecan-production-101/.
Yield Progression	Lbs/Acre, Year 8-20: 75, 125, 250, 400, 550, 700, 850, 950, 1000, 1000, 1100, 1250	Nesbitt, Monte. "Estimation of Pecan Tree Value." Auburn University Gulf Coast Substation, https://counties.agrilife.org/valverde/files/2014/11/Estimation-of-Pecan-Tree-Value.pdf.
Yield Progression	Lbs/Tree, Year 8-20: 2 lbs, up to 46	Nesbitt, Monte. "Estimation of Pecan Tree Value." Auburn University Gulf Coast Substation, https://counties.agrilife.org/valverde/files/2014/11/Estimation-of-Pecan-Tree-Value.pdf.
Yield Progression	Lbs/Tree, Year 21-30: 50 lbs, up to 92	Nesbitt, Monte. "Estimation of Pecan Tree Value." Auburn University Gulf Coast Substation, https://counties.agrilife.org/valverde/files/2014/11/Estimation-of-Pecan-Tree-Value.pdf.
In-Shell Pecan, Wholesale	$1.74 per lb	"Shelled Pecan Price Index." Pecan Report, May 2023, https://www.pecanreport.com/price-list/.
Spacing	40x40 (67 trees/ha), down to 80x40 (34 trees/ha), and eventually down to 80x80 (17 trees/ha)	Carroll, Becky, and Michael W. Smith. "Establishing a Pecan Orchard." Oklahoma State University Extension, Feb. 2017, https://extension.okstate.edu/fact-sheets/establishing-a-pecan-orchard.html.
Wood Density	735 kg/m3	"The Wood Database." Pecan, The Wood Database, July 2021, https://www.wood-database.com/pecan/.
BGB:AGB	22%; used black walnut as a proxy	Wotherspoon, Amy & Thevathasan, Naresh & Gordon, Andy & Voroney, Paul. (2014). Carbon sequestration potential of five tree species in a 25-year-old temperate tree-based intercropping system in southern Ontario, Canada. Agroforestry Systems. 10.1007/s10457-014-9719-0.
DBH	.3m, 12-inch DBH at 32 years, MAI = 7.5" at 20-year thinning	Andales, Allan, et al. "A model of pecan tree growth for the management of pruning and irrigation." Agricultural Water Management; Elsevier, 21 Feb. 2006, https://naldc.nal.usda.gov/download/27456/PDF#page=12&zoom=100,0,0.
Height	11.3m at Year 32 = 38 feet	Andales, Allan, et al. "A model of pecan tree growth for the management of pruning and irrigation." Agricultural Water Management; Elsevier, 21 Feb. 2006, https://naldc.nal.usda.gov/download/27456/PDF#page=12&zoom=100,0,0.
Cost of Nursery Stock	$19.95 per tree	Fonsah, Esendugue Greg, et al. "Budget Information for Pecans." University of Georgia College of Agricultural and Environmental Sciences, 2022, https://pecans.uga.edu/resources/budget-info.html.
TAM, SAM, SOM	Bearing acres: 407,000 bearing acres, 275m lbs	United States Department of Agriculture. "Pecan Production." USDA, 19 Jan. 2023, https://downloads.usda.library.cornell.edu/usda-esmis/files/5425kg32f/n5840623x/ww72cn927/pecnpr23.pdf
TAM, SAM, SOM	Lbs imported, 2023: 115,869,892 shelled, and 32,778,432 in shell = total of 132,259,109 lbs shelled	"Shelled Pecan Price Index." Pecan Report, May 2023, https://www.pecanreport.com/price-list/.
TAM, SAM, SOM	265,000 acres imported, if yield is 1,000 lbs per acre.	"Shelled Pecan Price Index." Pecan Report, May 2023, https://www.pecanreport.com/price-list/.
Fertility Plan	$200/hr AEA (6 hours to develop protocol, 1 hour to read results) + Team Time (3x1hrx5 people = 20 hours)	Propagate Ag, March 2022, www.propagateag.com
Source Soil Ammendments	Team time: 6 hours per new geography. 6 Hours Year 1, and 2 hours Year 2+	Propagate Ag, March 2022, www.propagateag.com
Subsoil Rip	$25/acre for cross-hatch ripping. 70% for single-direction not-crosshatched.	Propagate Ag, March 2022, www.propagateag.com
Disk/Turbotill + Roll & Level	$20.45/acre	Plastina, Alejandro, and Ann Johanns. "2022 Iowa Farm Custom Rate Survey." Iowa State University Extension, 2022, https://sheboygan.extension.wisc.edu/files/2022/06/Iowa.pdf.
Broadcast Soil Ammendments	Done with a fertilizer spreader. $9/acre for the application. $2/tree for dry ammendments.	Plastina, Alejandro, and Ann Johanns. "2022 Iowa Farm Custom Rate Survey." Iowa State University Extension, 2022, https://sheboygan.extension.wisc.edu/files/2022/06/Iowa.pdf.
Drill Seed Fall Cover Crop	23.35/acre	Plastina, Alejandro, and Ann Johanns. "2022 Iowa Farm Custom Rate Survey." Iowa State University Extension, 2022, https://sheboygan.extension.wisc.edu/files/2022/06/Iowa.pdf.
Mow Fall Cover Crop	$13.35/acre	Plastina, Alejandro, and Ann Johanns. "2022 Iowa Farm Custom Rate Survey." Iowa State University Extension, 2022, https://sheboygan.extension.wisc.edu/files/2022/06/Iowa.pdf.
Drill Seed Summer Annuals	$23.35/acre	Plastina, Alejandro, and Ann Johanns. "2022 Iowa Farm Custom Rate Survey." Iowa State University Extension, 2022, https://sheboygan.extension.wisc.edu/files/2022/06/Iowa.pdf.
Mow Summer Annual Cover Crop	$13.35/acre	Plastina, Alejandro, and Ann Johanns. "2022 Iowa Farm Custom Rate Survey." Iowa State University Extension, 2022, https://sheboygan.extension.wisc.edu/files/2022/06/Iowa.pdf.
Drill Perennial Groundcover	23.35/acre, $4.50/lb for a forage mix. Need time/cost.	Plastina, Alejandro, and Ann Johanns. "2022 Iowa Farm Custom Rate Survey." Iowa State University Extension, 2022, https://sheboygan.extension.wisc.edu/files/2022/06/Iowa.pdf.
Biological Drench	Spring drench with biologicals: Happens while subsoiling. Cost of biologicals is $.80/tree.	St. Clair, Cory. Advancing Eco Ag, Feb. 2023, https://www.advancingecoag.com/.
Plant Trees	$8.50/tree. Includes: Planting tree with root dip and terrasorb, digging hole, tree guard, watering in, coco fibre mat (labor and materials)	Propagate Ag, March 2022, www.propagateag.com
Sap Analysis	$180 all inclusive, 1 for every 2 acres	St. Clair, Cory. Advancing Eco Ag, Feb. 2023, https://www.advancingecoag.com/.
Mow Between Row Years 2-6	$13.35/acre, 3x/year	Plastina, Alejandro, and Ann Johanns. "2022 Iowa Farm Custom Rate Survey." Iowa State University Extension, 2022, https://sheboygan.extension.wisc.edu/files/2022/06/Iowa.pdf.
Mow Between Row Years 7-12	$13.35/acre, 2x/year	Plastina, Alejandro, and Ann Johanns. "2022 Iowa Farm Custom Rate Survey." Iowa State University Extension, 2022, https://sheboygan.extension.wisc.edu/files/2022/06/Iowa.pdf.
Mow Between Row Years 13+	$13.35/acre, 1x/year	Plastina, Alejandro, and Ann Johanns. "2022 Iowa Farm Custom Rate Survey." Iowa State University Extension, 2022, https://sheboygan.extension.wisc.edu/files/2022/06/Iowa.pdf.
Mow In-Row Years 2-6	$13.35/acre, 1x/year	Plastina, Alejandro, and Ann Johanns. "2022 Iowa Farm Custom Rate Survey." Iowa State University Extension, 2022, https://sheboygan.extension.wisc.edu/files/2022/06/Iowa.pdf.
Mow In-Row Years 6-12	$13.35/acre, 1x/year	Plastina, Alejandro, and Ann Johanns. "2022 Iowa Farm Custom Rate Survey." Iowa State University Extension, 2022, https://sheboygan.extension.wisc.edu/files/2022/06/Iowa.pdf.
Mow In-Row Years 13+	$13.35/acre, 1x/year	Plastina, Alejandro, and Ann Johanns. "2022 Iowa Farm Custom Rate Survey." Iowa State University Extension, 2022, https://sheboygan.extension.wisc.edu/files/2022/06/Iowa.pdf.
Acetic Acid (OG Herbicide)	Spot Spray: 30¬¢ per tree benchmark input cost, if grass is low. 30 seconds per tree.	Ramble On Farm. Propagate Ag, 2022, www.propagateag.com.
Scout & Diagnose Pests & Disease	3-4 minutes per acre, 6 times per year. This can mean: staying on top of moths, voles, deer etc.	Carroll, Becky. "A Calendar for Pecan Growers." Oklahoma State University Extension, Feb. 2017, https://extension.okstate.edu/fact-sheets/establishing-a-pecan-orchard.html.
Purchase & Pick Up Fertilizer	Years 3-30, 8 hours per year	Ramble On Farm. Propagate Ag, 2022, www.propagateag.com.
Spring Tree Drench	$95.49/acre in ingredients, plus 45 minutes per acre to apply.	St. Clair, Cory. Advancing Eco Ag, Feb. 2023, https://www.advancingecoag.com/.
Mid-Summer Tree Drench	$31.18/acre in ingredients, plus 45 minutes per acre to apply.	St. Clair, Cory. Advancing Eco Ag, Feb. 2023, https://www.advancingecoag.com/.
Fall Tree Drench	$67.81/acre in ingredients, plus 45 minutes per acre to apply.	St. Clair, Cory. Advancing Eco Ag, Feb. 2023, https://www.advancingecoag.com/.
Spread Fertilizer Years 3-5	$200/acre	Revord, Ron, et al. "Growing Chinese Chestnuts in Missouri." Agroforestry in Action, University of Missouri Center for Agroforestry, 2022, https://extension.missouri.edu/publications/af1007.
Spread Fertilizer Years 6-9	$200/acre	Revord, Ron, et al. "Growing Chinese Chestnuts in Missouri." Agroforestry in Action, University of Missouri Center for Agroforestry, 2022, https://extension.missouri.edu/publications/af1007.
Spread Fertilizer Years 10-15	$237/acre	Thompson, Bill. "2023 Estimated Costs and Returns per Acre, Trans Pecos Flood Irrigated Pecans, Years 10-20." Texas A&M AgriLife Extension Service, 2023, https://agecoext.tamu.edu/wp-content/uploads/2023/01/2023D6Pecans.pdf.
Spread Fertilizer Years 15+	$237/acre	Thompson, Bill. "2023 Estimated Costs and Returns per Acre, Trans Pecos Flood Irrigated Pecans, Years 10-20." Texas A&M AgriLife Extension Service, 2023, https://agecoext.tamu.edu/wp-content/uploads/2023/01/2023D6Pecans.pdf.
Spray: Cost of inputs	$361/acre/year at maturity: $30.12 per spray	Fonsah, Esendugue Greg, et al. "Budget Information for Pecans." University of Georgia College of Agricultural and Environmental Sciences, 2022, https://pecans.uga.edu/resources/budget-info.html.
Spray: X per year	12-14 times per year	Carroll, Becky. "A Calendar for Pecan Growers." Oklahoma State University Extension, Feb. 2017, https://extension.okstate.edu/fact-sheets/establishing-a-pecan-orchard.html.
Spray: Time	11.4 minutes per acre	Fonsah, Esendugue Greg, et al. "Budget Information for Pecans." University of Georgia College of Agricultural and Environmental Sciences, 2022, https://pecans.uga.edu/resources/budget-info.html.
Prune: Canopy Architecture	2 minutes per tree Years 4-6, 3 minutes Years 7-9.	CMF Exports. 2023, https://cmfexport.cl/.
Prune: Maintenance, by hand	16 hours per acre = 8:48 per tree	CMF Exports. 2023, https://cmfexport.cl/.
Muda Type 1: Management Years 1-10	20 hours per year	Propagate Ag, March 2022, www.propagateag.com
Muda Type 2: Management Years 1-10	20 hours per year	Propagate Ag, March 2022, www.propagateag.com
Research & Manager Education: Diagnoses, Optimization & Planning	Minimum 20 hours per year, every year.	Propagate Ag, March 2022, www.propagateag.com
General Equipment Use & Cost	$219.55 per acre per year	Thompson, Bill. "2023 Estimated Costs and Returns per Acre, Trans Pecos Flood Irrigated Pecans, Years 10-20." Texas A&M AgriLife Extension Service, 2023, https://agecoext.tamu.edu/wp-content/uploads/2023/01/2023D6Pecans.pdf.
Monitor Fruit Load	1 minute per acre, 2x per year. Starting in Year 10	Upson, Steve, et al. "Pecan Production 101." Noble Research Institute, https://www.noble.org/ag-publications/horticulture/pecan-production-101/.
Shake Tree (Thinning)	10 seconds per tree * 200% to move from tree to tree = 20 seconds per tree (need 2 people)	Fonsah, Esendugue Greg, et al. "Budget Information for Pecans." University of Georgia College of Agricultural and Environmental Sciences, 2022, https://pecans.uga.edu/resources/budget-info.html.
Irrigation	$31,490 fixed costs, $98.65 per acre in annual operating costs.	Fonsah, Esendugue Greg, et al. "Budget Information for Pecans." University of Georgia College of Agricultural and Environmental Sciences, 2022, https://pecans.uga.edu/resources/budget-info.html.
Fell tree (chainsaw)	Total time per tree equation: -2.4295 + 0.4222DBH + 0.0002DistT^2 ‚Üí -2.4295+.4222(10)+.0002(80^2) ‚Üí 3:05 per tree (need to overestimate due to increased bucking)	Long, Charles Robert. "Production and Cost Analysis of Two Harvesting Systems in Central Appalachia." West Virginia University, 2003, https://researchrepository.wvu.edu/etd/1327/.
Cable Skid to Portable Mill	163 ft3 per hour = 466 BFT / hr. If we're at $100/hr, that's $.21/BFT * 1.5 for inefficiencies of working in an orchard = $.32/bft	Long, Charles Robert. "Production and Cost Analysis of Two Harvesting Systems in Central Appalachia." West Virginia University, 2003, https://researchrepository.wvu.edu/etd/1327/.
Chip tops of thinned trees	104 seconds per m3, over .53 m3 per tree * 400% due to need for clean floor = 3:40 per tree to chip. Need to rent chipper + grapple.	Manzone, Marco, and Paolo Balsari. "Productivity and woodchip quality of different chippers during poplar plantation harvesting." Biomass and Bioenergy, Dec. 2015, https://www.sciencedirect.com/science/article/abs/pii/S0961953415301203.
Mill log	Contract: ($120/hr)/(800 BFT/hr * 50% up time) = $.30/BFT. Need 2 people.	"LT28 Portable Sawmill." Wood-Mizer, 2023, https://woodmizer.com/us/LT28-Portable-Sawmill.
Processing Building Overhead	Labor: 60 hours admin. Morton: 5,000 square feet * $100/sqft = $500,000	"Farms and Agriculture." Morton Buildings, 2023, https://mortonbuildings.com/projects/farm.
Shake Tree (Harvest)	21 minutes per acre	Fonsah, Esendugue Greg, et al. "Budget Information for Pecans." University of Georgia College of Agricultural and Environmental Sciences, 2022, https://pecans.uga.edu/resources/budget-info.html.
Tree Shaker Cost	$126,000 cost of shaker	Fonsah, Esendugue Greg, et al. "Budget Information for Pecans." University of Georgia College of Agricultural and Environmental Sciences, 2022, https://pecans.uga.edu/resources/budget-info.html.
Sweep Nuts	28 minutes per acre	Fonsah, Esendugue Greg, et al. "Budget Information for Pecans." University of Georgia College of Agricultural and Environmental Sciences, 2022, https://pecans.uga.edu/resources/budget-info.html.
Sweeper Cost	$33,600 cost of sweeper	Fonsah, Esendugue Greg, et al. "Budget Information for Pecans." University of Georgia College of Agricultural and Environmental Sciences, 2022, https://pecans.uga.edu/resources/budget-info.html.
Harvest Nuts	13 minutes per acre	Fonsah, Esendugue Greg, et al. "Budget Information for Pecans." University of Georgia College of Agricultural and Environmental Sciences, 2022, https://pecans.uga.edu/resources/budget-info.html.
Harvester Cost	$63,000 cost of harvester	Fonsah, Esendugue Greg, et al. "Budget Information for Pecans." University of Georgia College of Agricultural and Environmental Sciences, 2022, https://pecans.uga.edu/resources/budget-info.html.
Cleaning	Blower: $6825	Fonsah, Esendugue Greg, et al. "Budget Information for Pecans." University of Georgia College of Agricultural and Environmental Sciences, 2022, https://pecans.uga.edu/resources/budget-info.html.
Grading	Done by hand: 10 minutes per 1,000 lbs (around 16 hours per 100 acres)	Upson, Steve, et al. "Pecan Production 101." Noble Research Institute, https://www.noble.org/ag-publications/horticulture/pecan-production-101/.
Muda Type 1: Harvest	Increasing up to 20 hours per year at maturity.	Propagate Ag, March 2022, www.propagateag.com
Muda Type 2: Harvest	Increasing up to 20 hours per year at maturity.	Propagate Ag, March 2022, www.propagateag.com
Harvest Equipment Cleaning & Maintenance	Increasing up to 24 hours per year at maturity.	Carroll, Becky. "A Calendar for Pecan Growers." Oklahoma State University Extension, Feb. 2017, https://extension.okstate.edu/fact-sheets/establishing-a-pecan-orchard.html.
Refrigerate Nuts	CAPEX of $24,000 plus 3,600 kwh/year to operate 600 sq.ft cold storage * $.10/kwh = $360	"Keeping Crops Fresh for Market." University of Wisconsin-Madison Extension, 2015, https://fyi.extension.wisc.edu/cropstorage/files/2016/01/Keeping-Crops-Fresh-for-Market-2015-handout.pdf.
Sales & Marketing, Wholesale Nut Buyers	12 Hours per year	Upson, Steve, et al. "Pecan Production 101." Noble Research Institute, https://www.noble.org/ag-publications/horticulture/pecan-production-101/.
Sales & Marketing Overhead, Lumber	(100*150*49*2*.0695/24)/(100*150*49)*3600 = 21 seconds per BFT to sell pecan lumber	"Sawmill Financial Aspects." Fort Lewis College, https://ocs.fortlewis.edu/swcommunityforestry/workshops/sawmill%20improvement/data/Presentations%20Articles%20Worksheets/Sawmill%20and%20the%20Bottom%20Line/4a.%20Sawmill%20Financial%20Aspects.pdf.
Chestnuts
Hardiness Zone	USDA Hardiness Zones 4b to 9b	Chestnut Growers of America, March 2016, http://www.chestnutgrowers.org/growers.html.
Yield: Nuts	39.46 lbs/year average over 80 years	Bosco, Samantha. "The Past, Present, and Future Importance of Temperate Nut Trees to Haudenosaunee Food Sovereignty and Climate Smart Agriculture in New York State." 2023. Dissertation, DOI: 10.14237/ebl.14.2.2023.1840.
Yield: Nuts	Up to 2 buckets per tree (60 lbs), from high producers	Route 9 Cooperative, 2023, https://route9cooperative.com/.
Yield: Nuts	40 lbs per tree, Year 12	Revord, Ron, et al. "Growing Chinese Chestnuts in Missouri." Agroforestry in Action, University of Missouri Center for Agroforestry, 2022, https://extension.missouri.edu/publications/af1007.
Yield Progression	5 lbs in Year 7, 40 lbs in Year 13, 48 lbs in Year 20, 60 lbs in Year 24	Revord, Ron, et al. "Growing Chinese Chestnuts in Missouri." Agroforestry in Action, University of Missouri Center for Agroforestry, 2022, https://extension.missouri.edu/publications/af1007.
Price: Retail	$6/lb is an underestimate	Revord, Ron, et al. "Growing Chinese Chestnuts in Missouri." Agroforestry in Action, University of Missouri Center for Agroforestry, 2022, https://extension.missouri.edu/publications/af1007.
Price: Wholesale	$3.10/lb is from University of Missouri	Revord, Ron, et al. "Growing Chinese Chestnuts in Missouri." Agroforestry in Action, University of Missouri Center for Agroforestry, 2022, https://extension.missouri.edu/publications/af1007.
Price: Export	$2.72/lb, Export Price	Propagate Ag, March 2022, www.propagateag.com
Yield: Lumber	36 BFT/tree: Doyle log rule, with 45% DBH reduction to reduce recovery due to orchard-tree deforimities.	Bosco, Samantha. "The Past, Present, and Future Importance of Temperate Nut Trees to Haudenosaunee Food Sovereignty and Climate Smart Agriculture in New York State." 2023. Dissertation, DOI: 10.14237/ebl.14.2.2023.1840.
Price per BFT, Select, Retail	$7.80/BFT retail, benchmark of black walnut: Less character, but more scarcity	Timmermans, Steve. Personal interview. 30 June 2023. https://everwoods.ca/.
Price per BFT, Select, Wholesale	$6/BFT wholesale: Less character, but more scarcity	Timmermans, Steve. Personal interview. 30 June 2023. https://everwoods.ca/.
Price per BFT, #1 Common, Retail	$6.50/BFT retail: Less character, but more scarcity	Timmermans, Steve. Personal interview. 30 June 2023. https://everwoods.ca/.
Price per BFT, #1 Common, Wholesale	$5/BFT retail: Less character, but more scarcity	Timmermans, Steve. Personal interview. 30 June 2023. https://everwoods.ca/.
Spacing	50x50 ft final spacing ‚Üí 20x20 ft spacing, and then thin.	Revord, Ron, et al. "Growing Chinese Chestnuts in Missouri." Agroforestry in Action, University of Missouri Center for Agroforestry, 2022, https://extension.missouri.edu/publications/af1007.
Wood Density	480 kg/m3	"The Wood Database." American Chestnut, The Wood Database, July 2021, https://www.wood-database.com/american-chestnut/.
BGB:AGB	35%; used red oak as a proxy	Wotherspoon, Amy & Thevathasan, Naresh & Gordon, Andy & Voroney, Paul. (2014). Carbon sequestration potential of five tree species in a 25-year-old temperate tree-based intercropping system in southern Ontario, Canada. Agroforestry Systems. 10.1007/s10457-014-9719-0.
BGB:AGB	35%, confirmed, though this is from a 3-year-old tree.	Bosco, Samantha. "The Past, Present, and Future Importance of Temperate Nut Trees to Haudenosaunee Food Sovereignty and Climate Smart Agriculture in New York State." 2023. Dissertation, DOI: 10.14237/ebl.14.2.2023.1840.
C accrual	Stem biomass C at Year 22: 176.91 kg ‚Üí * (30/22) = 241.24 kg C at Year 30	Bosco, Samantha. "The Past, Present, and Future Importance of Temperate Nut Trees to Haudenosaunee Food Sovereignty and Climate Smart Agriculture in New York State." 2023. Dissertation, DOI: 10.14237/ebl.14.2.2023.1840.
Cost of Nursery Stock	Average: $4.48	Propagate Ag, March 2022, www.propagateag.com
Fertility Plan	$200/hr AEA (6 hours to develop protocol, 1 hour to read results) + Team Time (3x1hrx5 people = 20 hours)	Propagate Ag, March 2022, www.propagateag.com
Source Soil Ammendments	Team time: 6 hours per new geography. 6 Hours Year 1, and 2 hours Year 2+	Propagate Ag, March 2022, www.propagateag.com
Subsoil Rip	$25/acre for cross-hatch ripping. 70% for single-direction not-crosshatched.	Propagate Ag, March 2022, www.propagateag.com
Disk/Turbotill + Roll & Level	$20.45/acre	Plastina, Alejandro, and Ann Johanns. "2022 Iowa Farm Custom Rate Survey." Iowa State University Extension, 2022, https://sheboygan.extension.wisc.edu/files/2022/06/Iowa.pdf.
Broadcast Soil Ammendments	Done with a fertilizer spreader. $9/acre for the application. $2/tree for dry ammendments.	Plastina, Alejandro, and Ann Johanns. "2022 Iowa Farm Custom Rate Survey." Iowa State University Extension, 2022, https://sheboygan.extension.wisc.edu/files/2022/06/Iowa.pdf.
Drill Seed Fall Cover Crop	23.35/acre	Plastina, Alejandro, and Ann Johanns. "2022 Iowa Farm Custom Rate Survey." Iowa State University Extension, 2022, https://sheboygan.extension.wisc.edu/files/2022/06/Iowa.pdf.
Mow Fall Cover Crop	$13.35/acre	Plastina, Alejandro, and Ann Johanns. "2022 Iowa Farm Custom Rate Survey." Iowa State University Extension, 2022, https://sheboygan.extension.wisc.edu/files/2022/06/Iowa.pdf.
Drill Seed Summer Annuals	$23.35/acre	Plastina, Alejandro, and Ann Johanns. "2022 Iowa Farm Custom Rate Survey." Iowa State University Extension, 2022, https://sheboygan.extension.wisc.edu/files/2022/06/Iowa.pdf.
Mow Summer Annual Cover Crop	$13.35/acre	Plastina, Alejandro, and Ann Johanns. "2022 Iowa Farm Custom Rate Survey." Iowa State University Extension, 2022, https://sheboygan.extension.wisc.edu/files/2022/06/Iowa.pdf.
Drill Perennial Groundcover	$23.35/acre, $4.50/lb for a forage mix.	Plastina, Alejandro, and Ann Johanns. "2022 Iowa Farm Custom Rate Survey." Iowa State University Extension, 2022, https://sheboygan.extension.wisc.edu/files/2022/06/Iowa.pdf.
Mark: GPS Tractor Cross Hatch	$22.10 * 1.25 for GPS capacity = $27.63	Plastina, Alejandro, and Ann Johanns. "2022 Iowa Farm Custom Rate Survey." Iowa State University Extension, 2022, https://sheboygan.extension.wisc.edu/files/2022/06/Iowa.pdf.
Biological Drench	Spring drench with biologicals: Happens while subsoiling. Cost of biologicals is $.80/tree.	St. Clair, Cory. Advancing Eco Ag, Feb. 2023, https://www.advancingecoag.com/.
Root Soak at Planting	1 hour per 2000 trees. Inputs: Fungi perfecti, Bacteria in powder, Liquid Kelp, Molasses, Fish Hydrolysate, Trace Minerals. Included with Propagate Ag, March 2022, www.propagateag.com.
Propagate Ag, March 2022, www.propagateag.com	$8.50/tree. Includes: Planting tree with root dip and terrasorb, digging hole, tree tube and stake, coco fibre mat (labor and materials)
Foliar Feed	For nutrition + Moth: 30 seconds/tree, 2 people (one removes tube and replaces it; other sprays)	Ramble On Farm. Propagate Ag, 2022, www.propagateag.com.
Sap Analysis	$180 all inclusive, 1 for every 2 acres	St. Clair, Cory. Advancing Eco Ag, Feb. 2023, https://www.advancingecoag.com/.
Mow Between Row Years 2-6	$13.35/acre, 3x/year	Plastina, Alejandro, and Ann Johanns. "2022 Iowa Farm Custom Rate Survey." Iowa State University Extension, 2022, https://sheboygan.extension.wisc.edu/files/2022/06/Iowa.pdf.
Mow Between Row Years 7-12	$13.35/acre, 2x/year	Plastina, Alejandro, and Ann Johanns. "2022 Iowa Farm Custom Rate Survey." Iowa State University Extension, 2022, https://sheboygan.extension.wisc.edu/files/2022/06/Iowa.pdf.
Mow Between Row Years 13+	$13.35/acre, 1x/year	Plastina, Alejandro, and Ann Johanns. "2022 Iowa Farm Custom Rate Survey." Iowa State University Extension, 2022, https://sheboygan.extension.wisc.edu/files/2022/06/Iowa.pdf.
Mow In-Row Years 2-6	$13.35/acre, 1x/year	Plastina, Alejandro, and Ann Johanns. "2022 Iowa Farm Custom Rate Survey." Iowa State University Extension, 2022, https://sheboygan.extension.wisc.edu/files/2022/06/Iowa.pdf.
Mow In-Row Years 6-12	$13.35/acre, 1x/year	Plastina, Alejandro, and Ann Johanns. "2022 Iowa Farm Custom Rate Survey." Iowa State University Extension, 2022, https://sheboygan.extension.wisc.edu/files/2022/06/Iowa.pdf.
Mow In-Row Years 13+	$13.35/acre, 1x/year	Plastina, Alejandro, and Ann Johanns. "2022 Iowa Farm Custom Rate Survey." Iowa State University Extension, 2022, https://sheboygan.extension.wisc.edu/files/2022/06/Iowa.pdf.
Acetic Acid (OG Herbicide)	Spot Spray: 30¬¢ per tree benchmark input cost, if grass is low. 30 seconds per tree.	Ramble On Farm. Propagate Ag, 2022, www.propagateag.com.
Scout & Diagnose Pests & Disease	3-4 minutes per acre, 6 times per year. This can mean: staying on top of moths, voles, deer etc.	Route 9 Cooperative, 2023, https://route9cooperative.com/.
Remove Coir Mat or Rake Back Chips	20 seconds per tree.	Ramble On Farm. Propagate Ag, 2022, www.propagateag.com.
Rodent Traps: Install	10 minutes per acre	"Volex." Eco Clear Products, Sept. 2022, https://www.ecoclearproducts.com/products/volex.
Rodent Traps: Replace Bait	3 minutes per acre	Ramble On Farm. Propagate Ag, 2022, www.propagateag.com.
Raptor Perch	40 mins per post, $55 benchmark without labor: 16 ft 4x4 + 20 ft 2x4 = 23 BFT * 1.35 = $30 in lumber + $4 in screws & washers + cost of auger or post pounding	Ramble On Farm. Propagate Ag, 2022, www.propagateag.com.
Make KNF Compost for Drench	$80/yard, allocate 4 hours	Ramble On Farm. Propagate Ag, 2022, www.propagateag.com.
Purchase & Pick Up Fertilizer	Years 3-30, 8 hours per year	Ramble On Farm. Propagate Ag, 2022, www.propagateag.com.
Spring Tree Drench	$95.49/acre in ingredients, plus 45 minutes per acre to apply.	St. Clair, Cory. Advancing Eco Ag, Feb. 2023, https://www.advancingecoag.com/.
Mid-Summer Tree Drench	$31.18/acre in ingredients, plus 45 minutes per acre to apply.	St. Clair, Cory. Advancing Eco Ag, Feb. 2023, https://www.advancingecoag.com/.
Fall Tree Drench	$67.81/acre in ingredients, plus 45 minutes per acre to apply.	St. Clair, Cory. Advancing Eco Ag, Feb. 2023, https://www.advancingecoag.com/.
Spread Fertilizer Years 3-5	$200/acre	Revord, Ron, et al. "Growing Chinese Chestnuts in Missouri." Agroforestry in Action, University of Missouri Center for Agroforestry, 2022, https://extension.missouri.edu/publications/af1007.
Spread Fertilizer Years 6-9	$200/acre	Revord, Ron, et al. "Growing Chinese Chestnuts in Missouri." Agroforestry in Action, University of Missouri Center for Agroforestry, 2022, https://extension.missouri.edu/publications/af1007.
Spread Fertilizer Years 10-15	$237/acre	Thompson, Bill. "2023 Estimated Costs and Returns per Acre, Trans Pecos Flood Irrigated Pecans, Years 10-20." Texas A&M AgriLife Extension Service, 2023, https://agecoext.tamu.edu/wp-content/uploads/2023/01/2023D6Pecans.pdf.
Spread Fertilizer Years 15+	$237/acre	Thompson, Bill. "2023 Estimated Costs and Returns per Acre, Trans Pecos Flood Irrigated Pecans, Years 10-20." Texas A&M AgriLife Extension Service, 2023, https://agecoext.tamu.edu/wp-content/uploads/2023/01/2023D6Pecans.pdf.
Remove Tree Tube & Dispose	2 minutes per tree. Use farm truck to collect. Ask Plantra.	Ramble On Farm. Propagate Ag, 2022, www.propagateag.com.
Prune to Central Leader @ 7 ft	End of Year 2: Lift tree tube and remove major bifurcations. Year 2: 1 minute/tree, 2 people. Then: 1 minute per tree.	Ramble On Farm. Propagate Ag, 2022, www.propagateag.com.
Prune: Canopy Architecture	2 minutes per tree Years 4-6, 3 minutes Years 7-9. Ask Cesar on PTO saw	CMF Exports. 2023, https://cmfexport.cl/.
Willow
Hardiness Zone	Zone 3-8	"Salix Purpurea." Missouri Botanical Garden, July 2021, https://www.missouribotanicalgarden.org/PlantFinder/PlantFinderDetails.aspx?taxonid=250470&isprofile=0&.
Spacing	2.5 feet between double rows, 20 inches on center between stems. 20 feet between rows for silvopasture	Abrahamson, Lawrence P., et al. Shrub Willow Biomass Producers Handbook. December 2010, https://efotg.sc.egov.usda.gov/references/public/NY/SUNY_ESF_Shrub_Willow_Biomass_Producers_Handbook_12_2010.pdf.
Spacing	In Overyield: 10 inches between cuttings (20 inches, double row), rows are 22.5 feet on center.	Abrahamson, Lawrence P., et al. Shrub Willow Biomass Producers Handbook. December 2010, https://efotg.sc.egov.usda.gov/references/public/NY/SUNY_ESF_Shrub_Willow_Biomass_Producers_Handbook_12_2010.pdf.
Spacing	5 foot strip taken out of pasture	Abrahamson, Lawrence P., et al. Shrub Willow Biomass Producers Handbook. December 2010, https://efotg.sc.egov.usda.gov/references/public/NY/SUNY_ESF_Shrub_Willow_Biomass_Producers_Handbook_12_2010.pdf.
Growth Rate	4 tons/acre/year, adjusted to per stem = 6.2 lbs per stem, WET biomass, every year	"Eco Willow 2.0." SUNY ESF, https://www.esf.edu/willow/download.php.
Yield	3.1 lbs per stem, dry matter, every year	"Eco Willow 2.0." SUNY ESF, https://www.esf.edu/willow/download.php.
Yield	33% reduction, due to weed pressure: 2.06 lbs/year DM	Propagate Ag, March 2022, www.propagateag.com
Price, Dry Matter	$65 per round bale / 500 lbs DM = $.13/lb for DM	Bless, Brandon. Bread & Butter Farm. March 2021, https://breadandbutterfarm.com/.
Dollar Yield, Supplements	At price of imported supplements, fodder yields $.032/lb for minerals	Bless, Brandon. Bread & Butter Farm. March 2021, https://breadandbutterfarm.com/.
Offset cost, DM + Minerals	$.162/lb of fodder	Bless, Brandon. Bread & Butter Farm. March 2021, https://breadandbutterfarm.com/.
Opportunity cost: grass	4.16 sqft per stem / 43560 * 2.4 tons/acre = .51 lbs = $.02 in opportunity cost	"2022 State Agriculture Overview, Michigan." United States Department of Agriculture: National Agricultural Statistics Service, 2022, https://www.nass.usda.gov/Quick_Stats/Ag_Overview/stateOverview.php?state=MICHIGAN.
Total value created	$.142/lb	Bless, Brandon. Bread & Butter Farm. March 2021, https://breadandbutterfarm.com/.
Density, Willow	400 kg/m3	"The Wood Database." White Willow, The Wood Database, July 2021, https://www.wood-database.com/white-willow/.
Root to Shoot Ratio (AGB:BGB)	310% BGB:AGB (When just counting the coppice stool)	Pietrzykowski, M., Wo≈õ, B., Tylek, P. et al. Carbon sink potential and allocation in above- and below-ground biomass in willow coppice. J. For. Res. 32, 349‚Äì354 (2021). https://doi.org/10.1007/s11676-019-01089-3
Cost of Nursery Stock	$.12/cutting, at scale * 1.28 to account for inflation = $.15	"Eco Willow 2.0." SUNY ESF, https://www.esf.edu/willow/download.php.
Deer & Rabbit Damage	Crop loss of 10% per year	Abrahamson, Lawrence P., et al. Shrub Willow Biomass Producers Handbook. December 2010, https://efotg.sc.egov.usda.gov/references/public/NY/SUNY_ESF_Shrub_Willow_Biomass_Producers_Handbook_12_2010.pdf.
Order & Receive Trees	12 hours per year	Propagate Ag, March 2022, www.propagateag.com
Establishment: Single metric	$.24/stem in 2014 * 1.28 to account for inflation = $.31 * 150% to account for inefficiencies = $.47/stem	"Eco Willow 2.0." SUNY ESF, https://www.esf.edu/willow/download.php.
Maintenance costs	Year 2-7: $.11/stem * 1.28 to account for inflation * 150% to account for inefficiency = $.22/stem	"Eco Willow 2.0." SUNY ESF, https://www.esf.edu/willow/download.php.
Mulberry
Hardiness Zone	Zone 4-10	"Red Mulberry." Forest Service Southern Research Station, https://www.srs.fs.usda.gov/pubs/misc/ag_654/volume_2/morus/rubra.htm.
Spacing	2.5 feet between double rows	Shrub Willow Biomass Producer's Handbook, SUNY ESF
Spacing	50 cm between stems in-row, rows are 20 feet on center	Castro Ram√≠rez, √Ålvaro, and Edwin Orozco Barrantes. "CULTIVO DE MORERA (Morus spp) Y SU USO EN LA ALIMENTACI√ìN ANIMAL." INTA Costa Rica, 2011, San Jos√©, Costa Rica, http://www.platicar.go.cr/images/buscador/documents/pdf/07/00447-manualmorera.pdf.
Spacing	In Overyield: .41 feet between cuttings (.82, but double row), rows are 22.5 feet on center.	Propagate Ag, March 2022, www.propagateag.com
Spacing	5 foot strip taken out of pasture	Shrub Willow Biomass Producer's Handbook, SUNY ESF
Yield	Range of (6.94/4.34) to (11.81/4.34) = 1.6 to 2.72 lbs per cut wet	Castro Ram√≠rez, √Ålvaro, and Edwin Orozco Barrantes. "CULTIVO DE MORERA (Morus spp) Y SU USO EN LA ALIMENTACI√ìN ANIMAL." INTA Costa Rica, 2011, San Jos√©, Costa Rica, http://www.platicar.go.cr/images/buscador/documents/pdf/07/00447-manualmorera.pdf.
Yield	1.08 lbs DM average per cut IN COSTA RICA ‚Üí 2.16 lbs DM if cut twice	Castro Ram√≠rez, √Ålvaro, and Edwin Orozco Barrantes. "CULTIVO DE MORERA (Morus spp) Y SU USO EN LA ALIMENTACI√ìN ANIMAL." INTA Costa Rica, 2011, San Jos√©, Costa Rica, http://www.platicar.go.cr/images/buscador/documents/pdf/07/00447-manualmorera.pdf.
Yield	Assumption: USA is 50% yield of Costa Rica: 1.08 lbs max yield, USA	Castro Ram√≠rez, √Ålvaro, and Edwin Orozco Barrantes. "CULTIVO DE MORERA (Morus spp) Y SU USO EN LA ALIMENTACI√ìN ANIMAL." INTA Costa Rica, 2011, San Jos√©, Costa Rica, http://www.platicar.go.cr/images/buscador/documents/pdf/07/00447-manualmorera.pdf.
Yield	.855 lbs DM/tree, if 25% of intensiely-managed Morus indica in Southern India.	Varsha, K. & Raj, Asha & Kurien, Kurien & Bastin, Betty & Tk, Kunhamu & Pradeep, Koonath. (2019). High density silvopasture systems for quality forage production and carbon sequestration in humid tropics of Southern India. Agroforestry Systems. 93. 10.1007/s10457-016-0059-0.
Price, Dry Matter	$65 per round bale / 500 lbs DM = $.13/lb for DM	Bless, Brandon. Bread & Butter Farm. March 2021, https://breadandbutterfarm.com/.
Dollar Yield, Supplements	At price of imported supplements, fodder yields $.032/lb for minerals	Bless, Brandon. Bread & Butter Farm. March 2021, https://breadandbutterfarm.com/.
Offset cost, DM + Minerals	$.162/lb of fodder	Bless, Brandon. Bread & Butter Farm. March 2021, https://breadandbutterfarm.com/.
Opportunity cost: grass	4.16 sqft per stem / 43560 * 2.4 tons/acre = .51 lbs = $.02 in opportunity cost	"2022 State Agriculture Overview, Michigan." United States Department of Agriculture: National Agricultural Statistics Service, 2022, https://www.nass.usda.gov/Quick_Stats/Ag_Overview/stateOverview.php?state=MICHIGAN.
Density, Mulberry	690 kg/m3	"The Wood Database." Mulberry, The Wood Database, July 2021, https://www.wood-database.com/mulberry/.
Root to Shoot Ratio (AGB:BGB)	125% BGB:AGB (When just counting the coppice stool)	Varsha, K. & Raj, Asha & Kurien, Kurien & Bastin, Betty & Tk, Kunhamu & Pradeep, Koonath. (2019). High density silvopasture systems for quality forage production and carbon sequestration in humid tropics of Southern India. Agroforestry Systems. 93. 10.1007/s10457-016-0059-0.
Cost of Nursery Stock	.41/stem, including shipping	Virginia Department of Forestry, July 2021, https://www.buyvatrees.com/.
Deer & Rabbit Damage	Crop loss of 10% per year	Elizondo Braun, Jaime. Real Wealth Ranching. 2021. Accessed July 2021. https://www.rwranching.com/.
Order & Receive Trees	12 hours per year	Propagate Ag, March 2022, www.propagateag.com
Establishment: Subsoiling	Contract: $22.50 * 150% premium for non-standard use = $33.75	Plastina, Alejandro, and Ann Johanns. "2022 Iowa Farm Custom Rate Survey." Iowa State University Extension, 2022, https://sheboygan.extension.wisc.edu/files/2022/06/Iowa.pdf.
Establishment: Disking	Contract: $20.45 * 150% premium for non-standard use = $30.68, done 2x	Plastina, Alejandro, and Ann Johanns. "2022 Iowa Farm Custom Rate Survey." Iowa State University Extension, 2022, https://sheboygan.extension.wisc.edu/files/2022/06/Iowa.pdf.
Establishment: Tree transplanter	Contract: subsoiling as a proxy, $22.50 * 300% premium for non-standard operation = $67.5/acre	Plastina, Alejandro, and Ann Johanns. "2022 Iowa Farm Custom Rate Survey." Iowa State University Extension, 2022, https://sheboygan.extension.wisc.edu/files/2022/06/Iowa.pdf.
Establishment: Tree transplanter	$.05/tree. Contract: $67.5 / 2420 stems/acre = $.03 per tree for the operator. + 2 seconds or $.02 for the hand labor	Plastina, Alejandro, and Ann Johanns. "2022 Iowa Farm Custom Rate Survey." Iowa State University Extension, 2022, https://sheboygan.extension.wisc.edu/files/2022/06/Iowa.pdf.
Disking, Single Activity	Year 1-7, 3x per year, $30.68 per acre	N√©meth, M√°rton. Sylvanus Forestry. March 2021, https://silvanusforestry.com/en/.
Maintenance costs	Year 2-7: $.11/stem * 1.28 to account for inflation * 150% to account for inefficiency = $.22/stem	"Eco Willow 2.0." SUNY ESF, https://www.esf.edu/willow/download.php.
